# Supplementary material for: Polymorphic SERPINA3 prolongs oligomeric state of amyloid beta
Source: PubMed Central journal article supplement (PMC7932536; doi:10.1371/journal.pone.0248027), 2021-03-04
Supplement: pone.0248027.s006.pdf [file pone.0248027.s006.pdf]

**S1 Table.** Position of polymorphism of JF1, SAMR1 and SAMP8 type Serpina3n proteins in the open reading frame (ORF).

| <b>Serial No.</b> | <b>Amino acid position in ORF</b> | <b>JF1</b>    | <b>SAMR1</b> | <b>SAMP8</b>    |
|-------------------|-----------------------------------|---------------|--------------|-----------------|
| 1.                | 69                                | Lysine        | Threonine    | Threonine       |
| 2.                | 84                                | Valine        | Leucine      | Leucine         |
| 3.                | 85                                | Methionine    | Valine       | Valine          |
| 4.                | 156                               | Arginine      | Lysine       | Lysine          |
| 5.                | 157                               | Alanine       | Threonine    | Threonine       |
| 6.                | 258                               | Phenylalanine | Serine       | Serine          |
| 7.                | 273                               | Methionine    | Methionine   | <b>Leucine</b>  |
| 8.                | 281                               | Lysine        | Lysine       | <b>Arginine</b> |
