# Supplementary material for: Polymorphic SERPINA3 prolongs oligomeric state of amyloid beta
Source: PubMed Central journal article supplement (PMC7932536; doi:10.1371/journal.pone.0248027), 2021-03-04

Fig 3\_E\_raw image

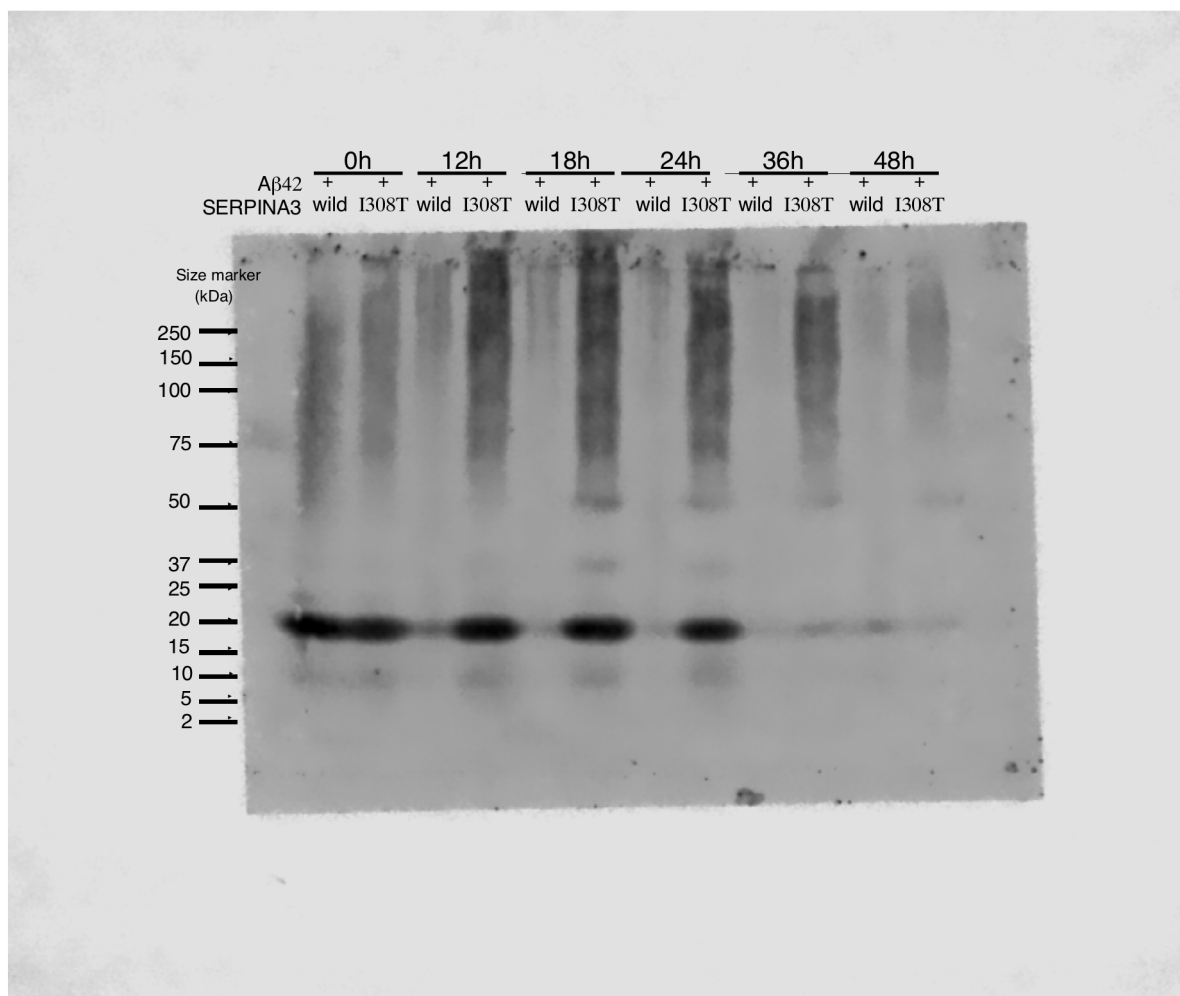

S1\_D\_Fig\_raw\_images

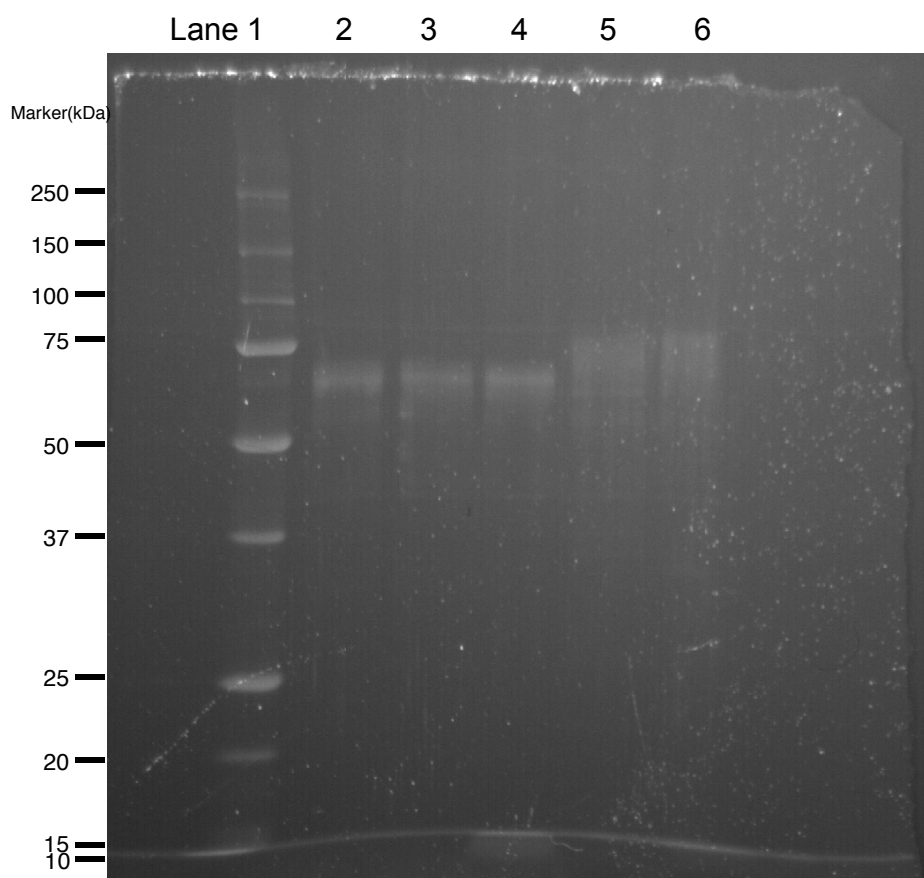

S3\_A\_Fig\_raw\_images

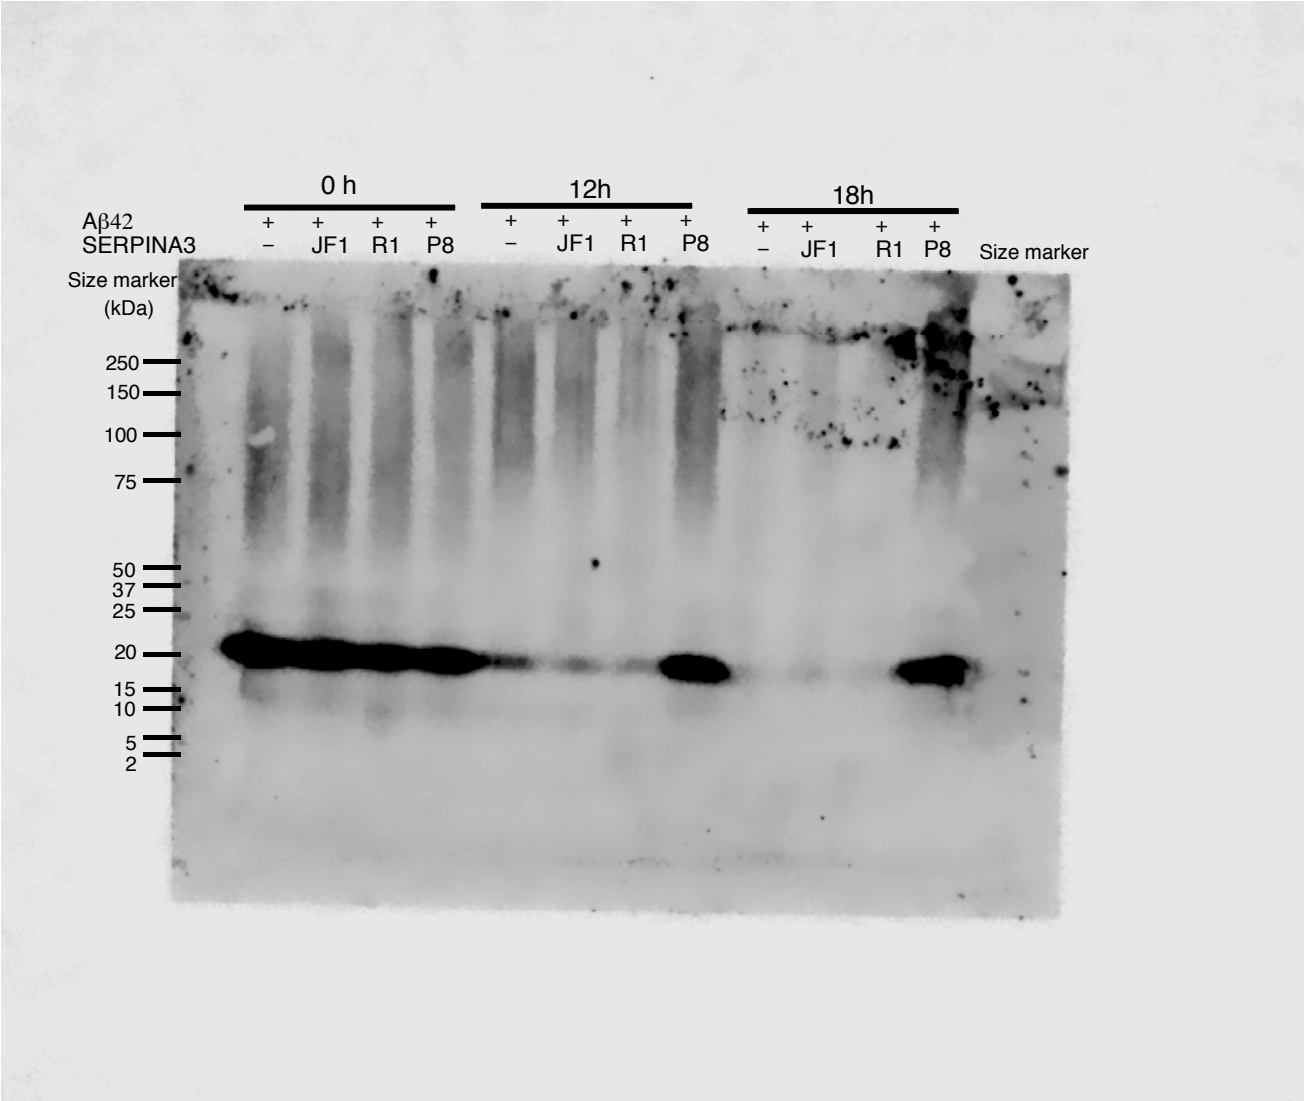

S3\_B\_Fig\_raw\_images

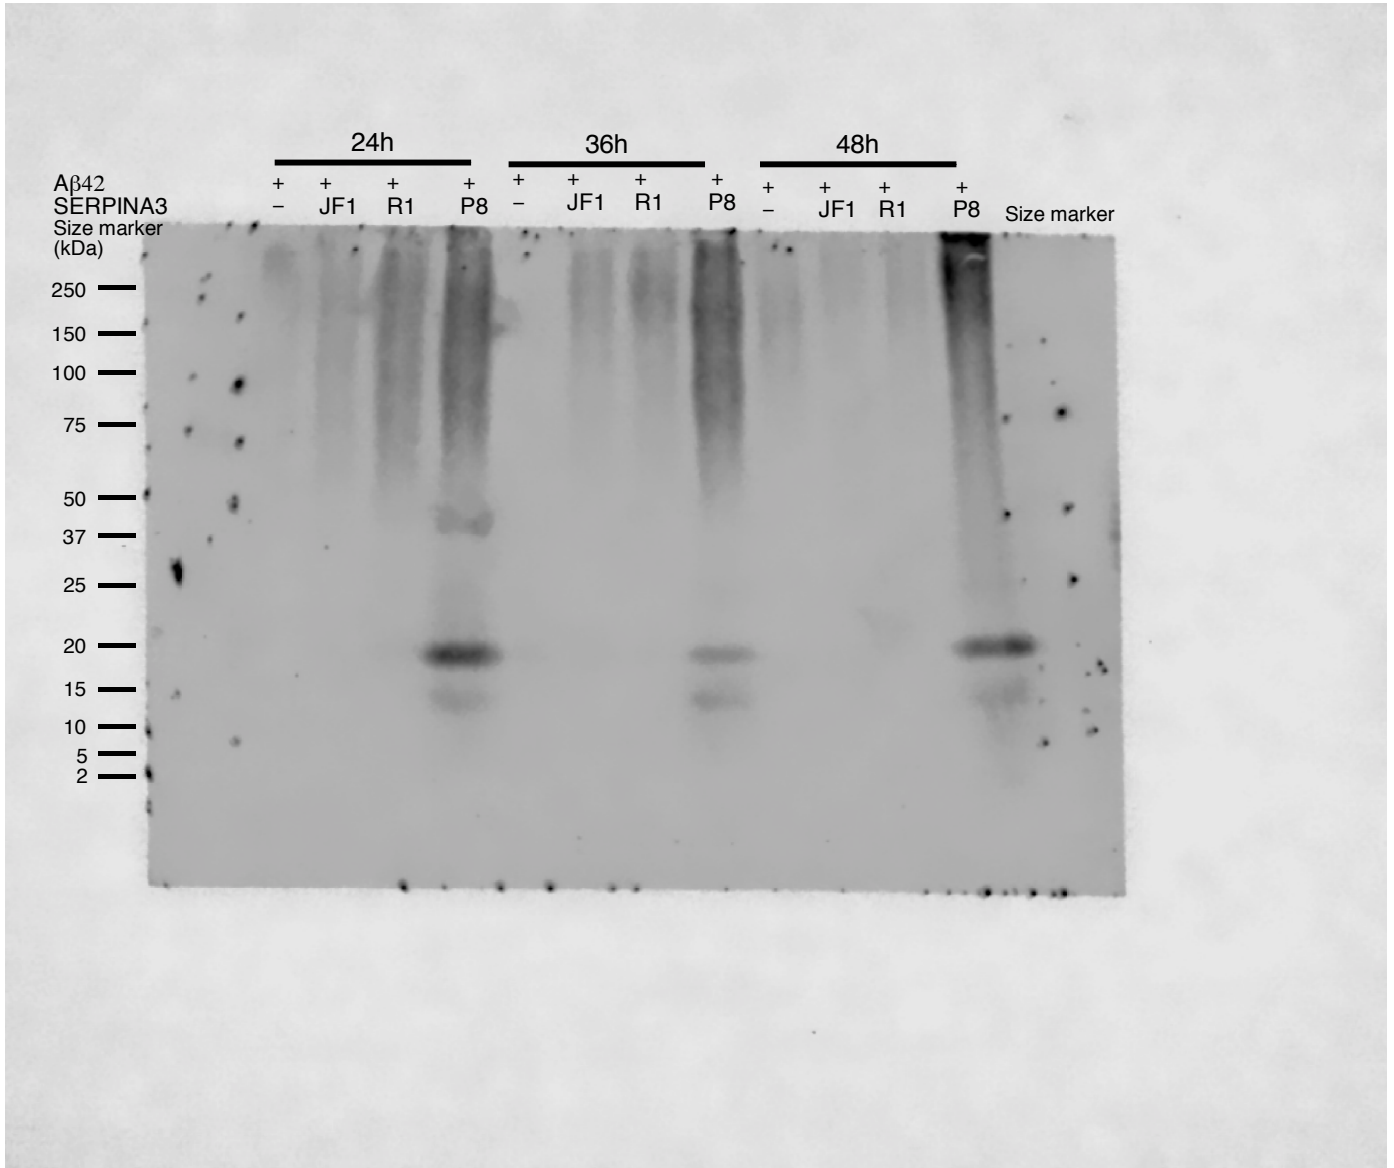

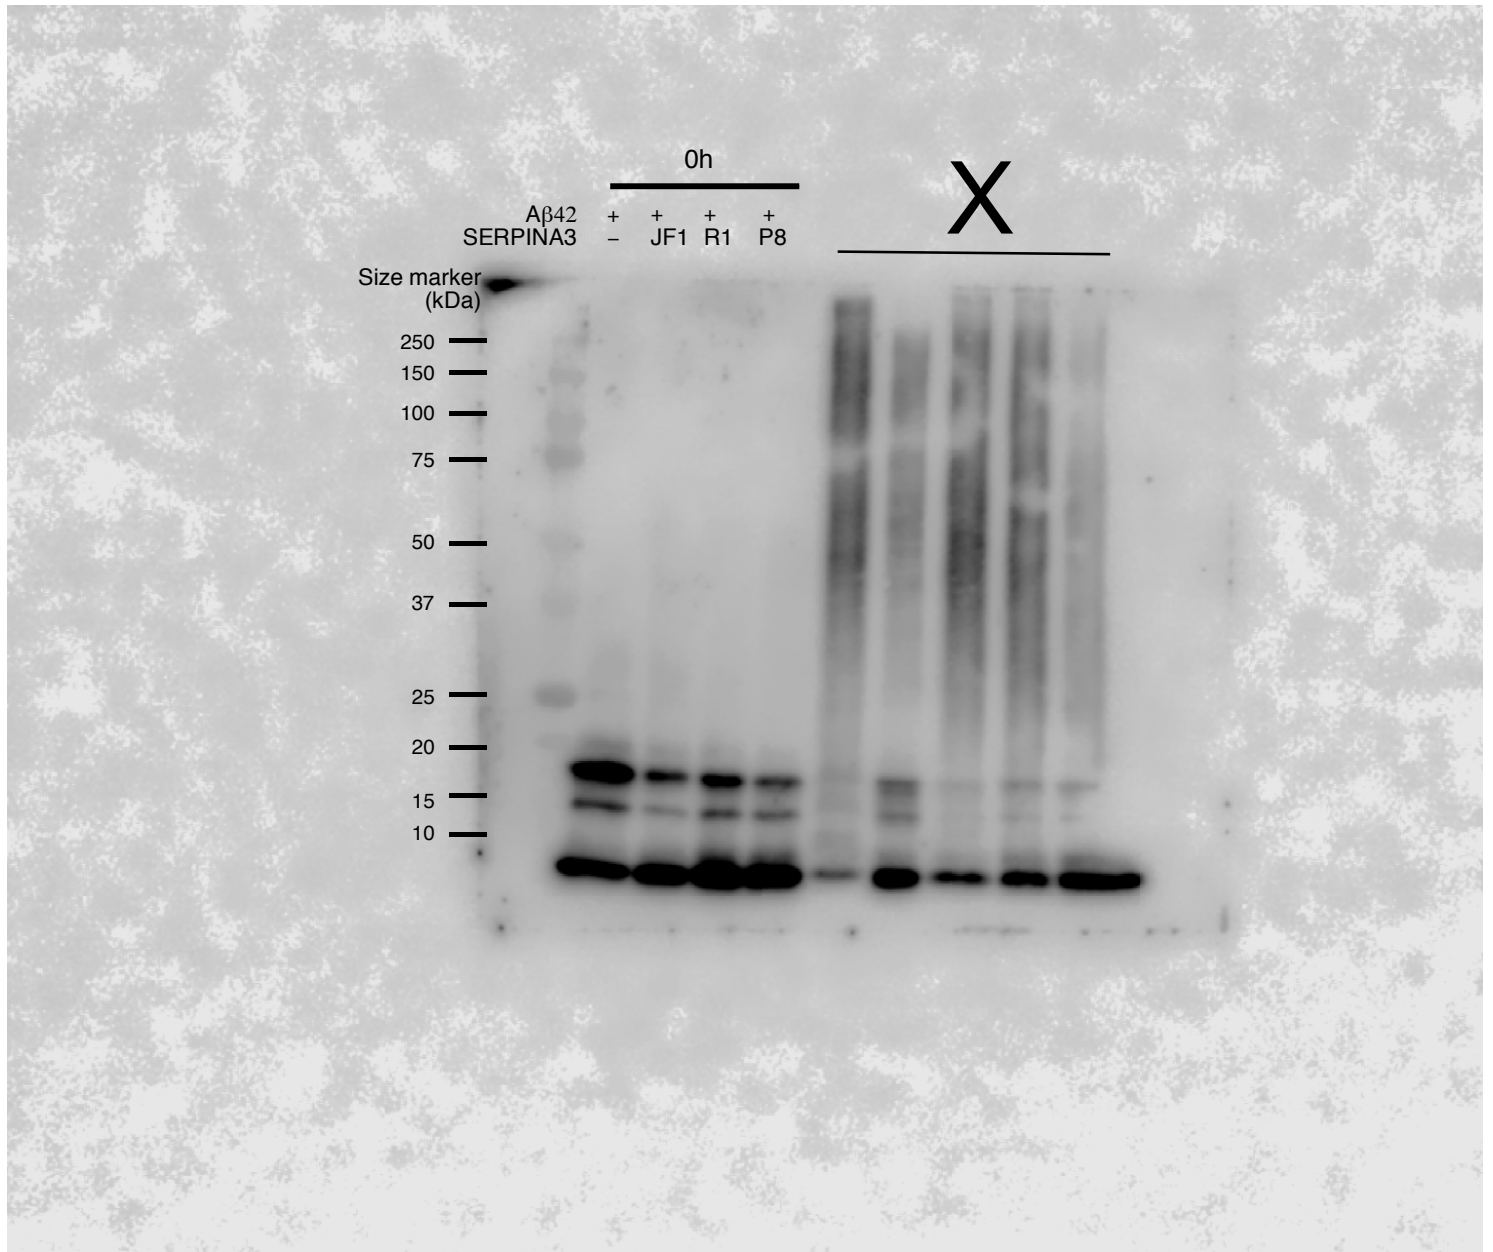

Supplement: pone.0248027.s007.pdf [file pone.0248027.s007.pdf]
